# Supplementary material for: Training Needs Assessment: The Case of Female Rice Farmers in Northern Iran
Source: MDPI journal article supplement (doi:10.3390/agriculture12030390), 2022-03-10
Supplement: s1 [file s1]

## Supplementary Materials

Questionnaire code:

Date:

Greetings and good luck to you, the women paddy farmers. This questionnaire has been designed to conduct a scientific study entitled: “**Modeling the educational needs of female rice farmers in Sari**”. The purpose of this study is to identify the educational extension needs of female paddy farmers in order to provide correct and principled training and to increase this product more and better in terms of quality and quantity. Therefore, your comments and information will help us in achieving the goals of this research. It should be noted that all your information and answers in this questionnaire are considered confidential. We appreciate your scientific and honest cooperation in completing this form as quickly as possible.

### Part 1: Training needs

The table below asks some questions about training needs. Please mark the importance of that activity.

| Training needs                                                                                 | Very low | Low | Medium | High | So high |
|------------------------------------------------------------------------------------------------|----------|-----|--------|------|---------|
| Understanding the set of environmental factors (temperature, location, light, water, and soil) |          |     |        |      |         |
| Familiarity with seedling preparation and treasury management                                  |          |     |        |      |         |
| Familiarity with preparing seedbed soil                                                        |          |     |        |      |         |
| Familiarity with seed disinfection methods                                                     |          |     |        |      |         |
| Familiarity with transplanting methods                                                         |          |     |        |      |         |
| Familiarity with traditional and mechanized treasuries                                         |          |     |        |      |         |
| Familiarity with different varieties of rice                                                   |          |     |        |      |         |
| Ability to identify cultivars compatible with the region                                       |          |     |        |      |         |
| Familiarity with the right time to produce seedlings                                           |          |     |        |      |         |
| Familiarity with the right place to prepare the seedlings                                      |          |     |        |      |         |
| Familiarity with how to prepare the land for planting                                          |          |     |        |      |         |
| Familiarity with the time of transplanting seedlings to the main land                          |          |     |        |      |         |
| Familiarity with the correct method of planting seedlings in the main land                     |          |     |        |      |         |
| Familiarity with the criteria for selecting the appropriate cultivars                          |          |     |        |      |         |
| Familiarity with methods of maintenance and protection of seedlings in the main land           |          |     |        |      |         |
| Familiarity with proper irrigation system                                                      |          |     |        |      |         |

|                                                                         |  |  |  |  |  |
|-------------------------------------------------------------------------|--|--|--|--|--|
| Familiarity with common rice diseases in the region                     |  |  |  |  |  |
| Familiarity with how to fight these diseases                            |  |  |  |  |  |
| Familiarity with the symptoms of rice diseases                          |  |  |  |  |  |
| Familiarity with effective factors in the spread of rice diseases       |  |  |  |  |  |
| Familiarity with common rice pests in the region                        |  |  |  |  |  |
| Familiarity with how to fight these pests                               |  |  |  |  |  |
| Familiarity with proper weed control and control methods                |  |  |  |  |  |
| Familiarity with the right time to harvest the product                  |  |  |  |  |  |
| Familiarity with the correct methods of harvesting rice                 |  |  |  |  |  |
| Familiarity with the tools and equipment needed to harvest the product  |  |  |  |  |  |
| Familiarity with ways to prevent wastage of products                    |  |  |  |  |  |
| Familiarity with the correct and appropriate principles of rice storage |  |  |  |  |  |
| Familiarity with rice storage pests and diseases                        |  |  |  |  |  |
| Familiarity with the correct methods of rice threshing                  |  |  |  |  |  |
| Familiarity with the right time to supply rice to the consumer market   |  |  |  |  |  |
| Familiarity with the principles of standardization and grading of rice  |  |  |  |  |  |
| Familiarity with the principles of standard and proper transportation   |  |  |  |  |  |
| Familiarity with how to fight pests and storage diseases                |  |  |  |  |  |
| Familiarity with consumer needs                                         |  |  |  |  |  |
| Familiarity with the right place to supply and sale                     |  |  |  |  |  |
| Familiarity with how to advertise and distribute the product            |  |  |  |  |  |

## Part 2: Educational extension methods

To what extent do you consider the following methods suitable for obtaining information in the field of rice cultivation, and to what extent have the following training methods been used for your training? Please read each item carefully and mark your answer.

|                               |          |     |        |      |         |
|-------------------------------|----------|-----|--------|------|---------|
| Educational-extension methods | Very low | Low | Medium | High | So high |
|-------------------------------|----------|-----|--------|------|---------|

|                                                                              |  |  |  |  |  |
|------------------------------------------------------------------------------|--|--|--|--|--|
| Face-to-face meetings with promoters at work (office)                        |  |  |  |  |  |
| The presence of promoters in the paddy fields                                |  |  |  |  |  |
| Discussion sessions of female paddy farmers with each other and with experts |  |  |  |  |  |
| Participation in training classes                                            |  |  |  |  |  |
| Providing practical training in paddy fields                                 |  |  |  |  |  |
| Broadcasting educational programs through the media                          |  |  |  |  |  |
| Use of educational-promotional magazines and publications                    |  |  |  |  |  |
| Using the school teaching method on the farm                                 |  |  |  |  |  |
| Using the guidance of leaders and the advice of local trustees               |  |  |  |  |  |
| Using the display of rice planting methods                                   |  |  |  |  |  |
| Rice Association activity in extension training                              |  |  |  |  |  |
| Using the display methods of having rice                                     |  |  |  |  |  |
| Displaying performance comparisons in different rice cultivars               |  |  |  |  |  |

### Part 3: Social characteristics

How much is your participation in the following activities? Please read each item carefully and mark your answer.

| Social characteristics                                            | Very low | Low | Medium | High | So high |
|-------------------------------------------------------------------|----------|-----|--------|------|---------|
| Participation in rural cooperatives                               |          |     |        |      |         |
| Participation in preparation of the treasury                      |          |     |        |      |         |
| Participation in transfer of seedlings to the main land           |          |     |        |      |         |
| Participation in rice harvesting                                  |          |     |        |      |         |
| Participation in religious ceremonies of other women rice farmers |          |     |        |      |         |
| Participation in product marketing and sales                      |          |     |        |      |         |
| Participate with other female rice farmers in community services  |          |     |        |      |         |

### Part 4: Economic factors

To what extent are the following economic factors important in rice cultivation? Please read each item carefully and mark your answer.

| Economic factors                                                                            | Very low | Low | Medium | High | So high |
|---------------------------------------------------------------------------------------------|----------|-----|--------|------|---------|
| Investigating financial problems and providing appropriate solutions by government agencies |          |     |        |      |         |

|                                                                                 |  |  |  |  |  |
|---------------------------------------------------------------------------------|--|--|--|--|--|
| Fulfillment of commitments by the government in purchasing rice products        |  |  |  |  |  |
| Preparing the ground for the government to provide the required inputs for rice |  |  |  |  |  |
| Supplying the required inputs                                                   |  |  |  |  |  |
| Having access to credits and facilities                                         |  |  |  |  |  |
| Having access to paddy farm insurance services                                  |  |  |  |  |  |
| Providing optimal and appropriate rice insurance services by the government     |  |  |  |  |  |

#### **Part 5: Educational extension features**

- 1) Have you ever had training-extension courses (such as a school on a farm) in planting, holding, and harvesting rice?
- 2) If educational extension classes have been offered, have you attended any of them?
- 3) If yes, how many times have you participated in these courses?
- 4) If not, what is the reason for your not attending these classes?
- 5) Availability of transportation system
- 6) Lack of instructor's skills
  - a) Inappropriate time for courses
  - b) Lack of interest in the educational subject
  - c) Inadequacy of the educational place
  - d) Lack of knowledge about the formation of classes
- 7) Would you like to have training classes in rice farming?

#### **Part 6: Personal, economic, and professional characteristics**

Dear respondent, below are some questions about your job, economic, and personal characteristics. After reading each question, please mark the desired answer with a \* mark or in a blank space.

- 1) Age: ..... years
- 2) Marital status:
  - a) Married
  - b) Single
  - c) Divorced
  - d) Widow
- 3) If you are the head of the household, what is the number of dependents?
- 4) Education level
  - a) Illiterate
  - b) Primary school
  - c) Secondary school
  - d) High school
  - e) Diploma
  - f) University

- 5) Main job:
  - a) Agriculture
  - b) Livestock
  - c) Gardening
  - d) Employed
  - e) Self-employment
  - f) House keeper
  - g) Joint employment, please name
- 6) What is the area under your rice cultivation per hectare?
- 7) For how many years have you been active in the field of rice cultivation?
- 8) What is the average annual yield of your rice crop per hectare?
- 9) What is your average annual income from rice cultivation?
- 10) What is the type of ownership of your paddy land?
  - a) Private property
  - b) Rental property
  - c) Hypothetical or communal property
  - d) Endowed property
- 11) How far is your paddy farm from your home?
- 12) Is there a rice cooperative for rural women in your area?
- 13) If yes, are you a member of this cooperative?
- 14) Have you ever used support facilities such as loans, agricultural inputs, supplies and equipment, etc. for rice cultivation?
- 15) Is there a fund for rural women in your area?
- 16) Are rural women's organizations common in your area?
- 17) If there are these organizations, what kind of activities are done in them? Please name.
